# Supplementary material for: Repertoire of Bovine miRNA and miRNA-Like Small Regulatory RNAs Expressed upon Viral Infection
Source: PubMed Central journal article supplement (PMC2713767; doi:10.1371/journal.pone.0006349), 2009-07-27
Supplement: pone.0006349.s006.pdf [file pone.0006349.s006.pdf]

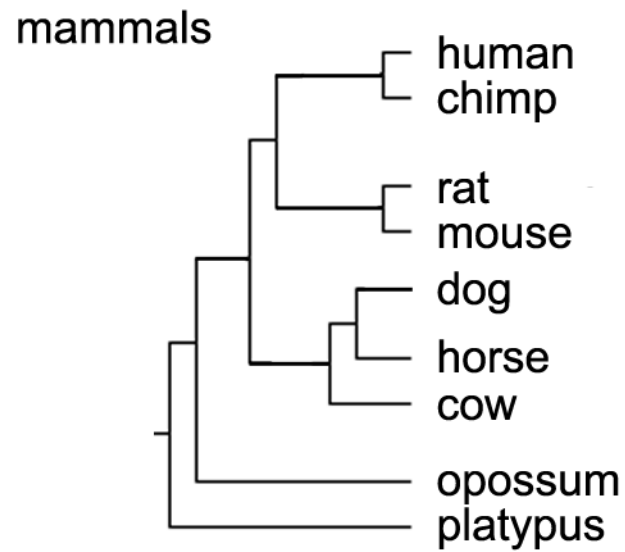

**Supplemental Figure S1. Summary of phylogenetic relationships of the mammalian species discussed in this study.** The tree structure used with modifications from Hedges et al. (Hedges et al. 2006).
