# Supplementary material for: Repertoire of Bovine miRNA and miRNA-Like Small Regulatory RNAs Expressed upon Viral Infection
Source: PubMed Central journal article supplement (PMC2713767; doi:10.1371/journal.pone.0006349), 2009-07-27
Supplement: pone.0006349.s008.pdf [file pone.0006349.s008.pdf]

## Glazov EA et al. Supplemental Figure S3

Fig S3a.

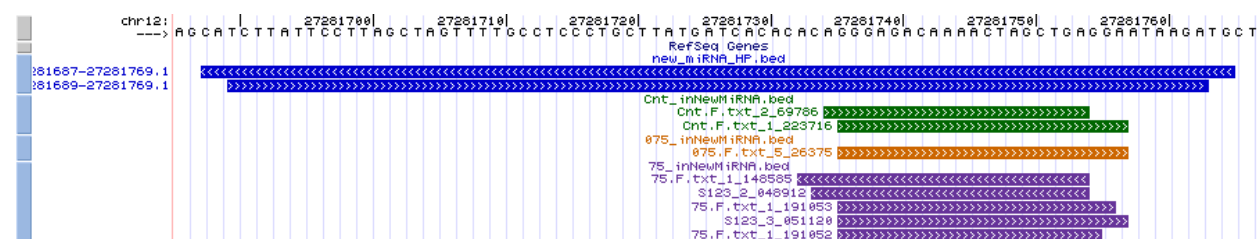

Fig S3b.

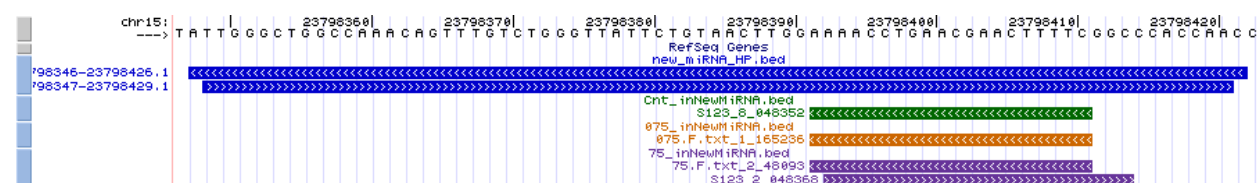

Fig S3c.

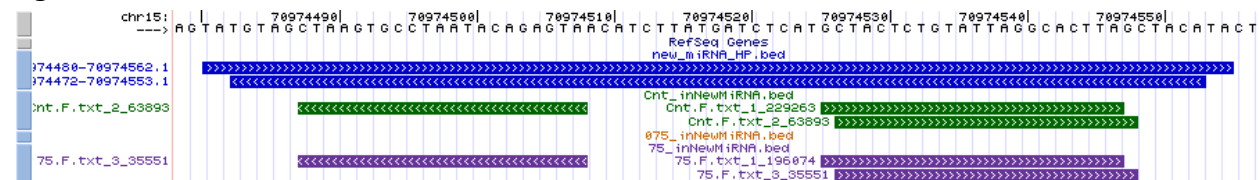

Fig S3d.

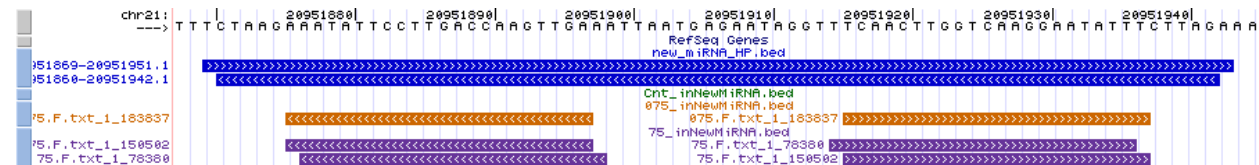

Fig S3e.

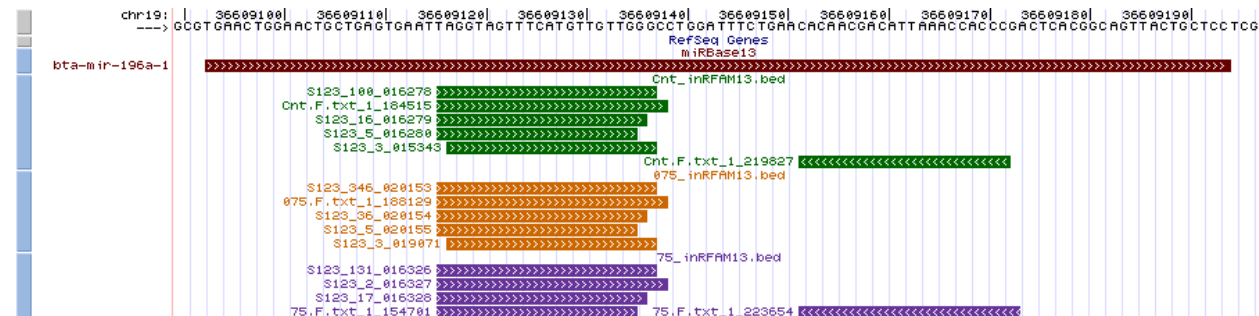

## Glazov EA et al. Supplemental Figure S3

Fig S3f.

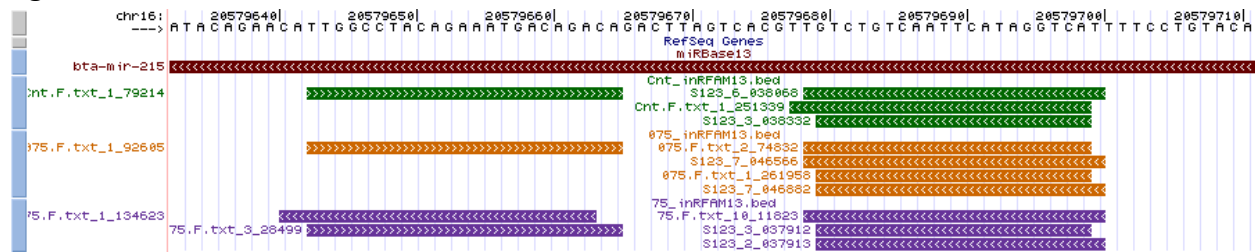

Fig S3g.

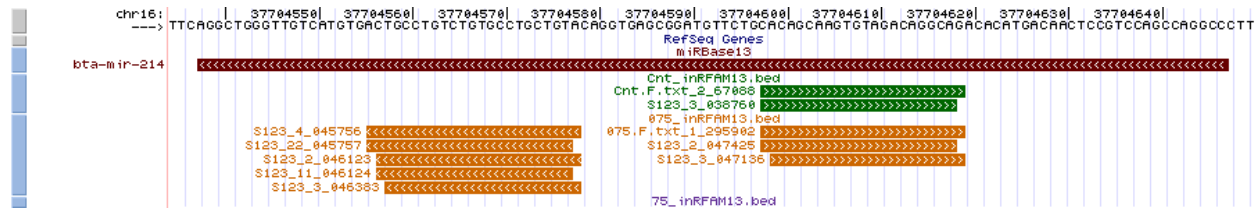

Fig S3h.

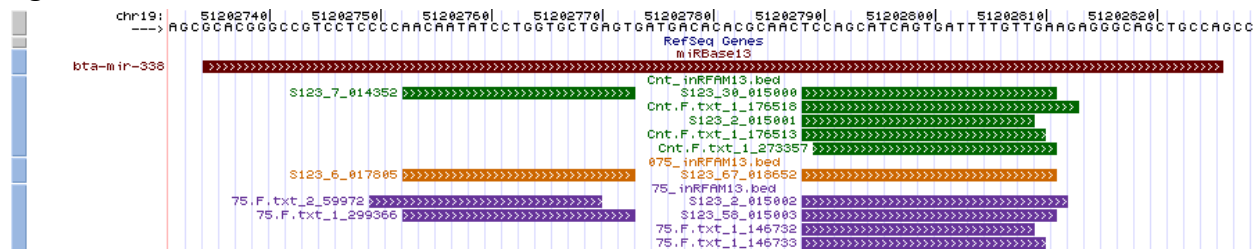

**Supplemental Figures S3a-S3h. Bidirectional miRNA candidates. (S3a-S3d)** New miRNA candidates that have evidence of transcription and predicted hairpin-like structures on both genomic strands. **(S3e-S3g)** Known miRNA candidates that have evidence of transcription and predicted hairpin-like structures on both genomic strands. **(S3h)** Cow miRNA bta-mir-338 that has evidence of bidirectional transcription in other species (Tyler et al. 2008). The figures shows UCSC genome browser screens displaying relative positions of predicted miRNA hairpin-like precursors (blue) or known miRNA precursor (deep red), and sequence tags originating from this loci in three small RNA libraries: mock-infected control - green, MOI 0.75 library - dark orange, MOI 7.5 library – magenta. Arrowheads indicate alignment of sequences relative to the genomic strands.
