# Supplementary material for: Repertoire of Bovine miRNA and miRNA-Like Small Regulatory RNAs Expressed upon Viral Infection
Source: PubMed Central journal article supplement (PMC2713767; doi:10.1371/journal.pone.0006349), 2009-07-27
Supplement: pone.0006349.s010.pdf [file pone.0006349.s010.pdf]

## Glazov EA et al. Supplemental Figure S5

Fig S5a.

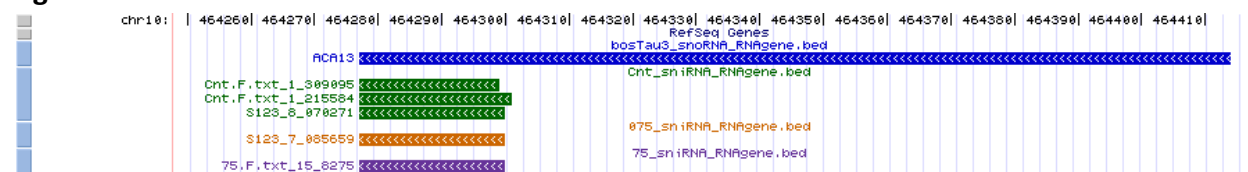

Fig S5b.

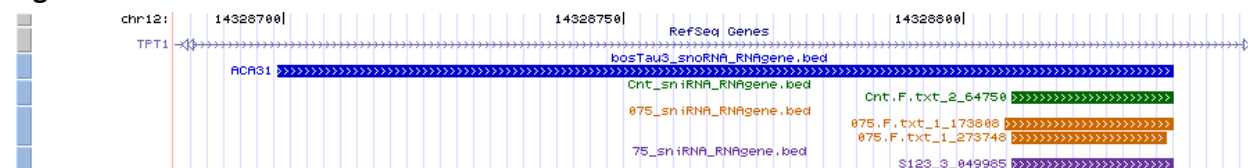

Fig S5c.

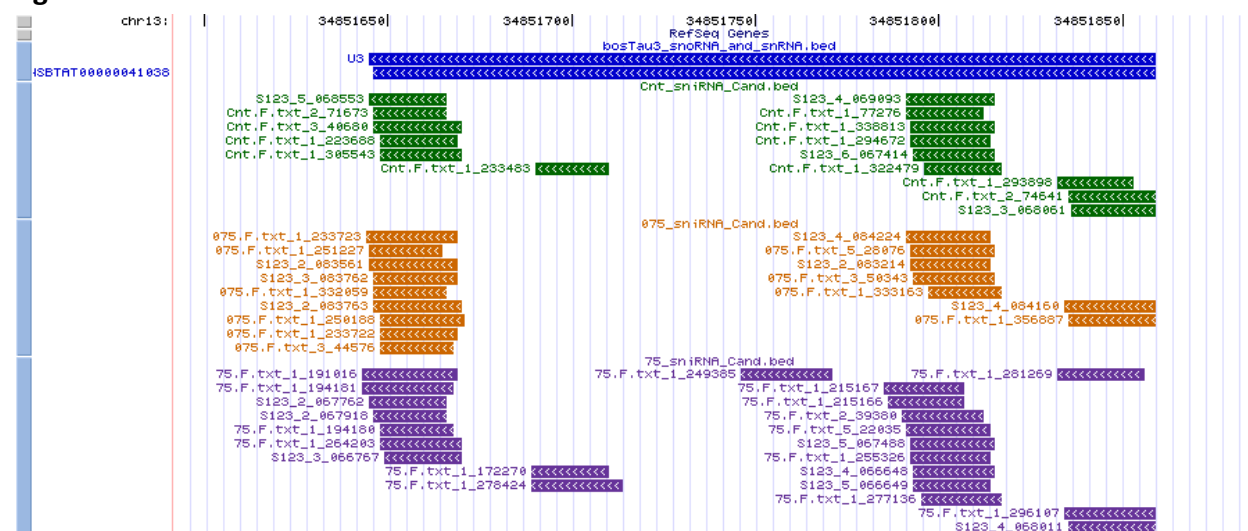

Fig S5d.

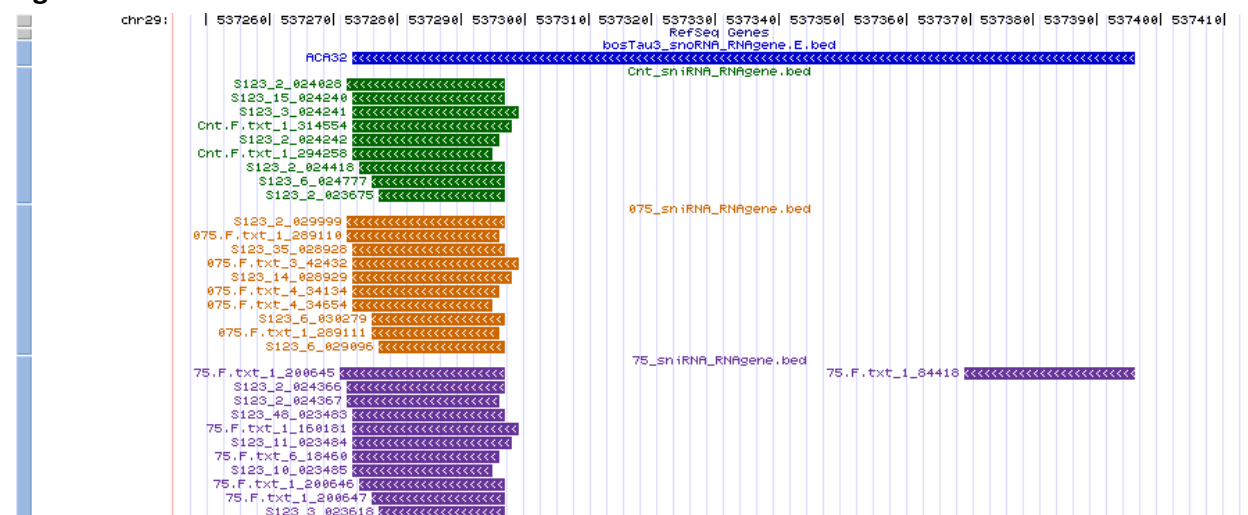

## Glazov EA et al. Supplemental Figure S5

Fig S5e.

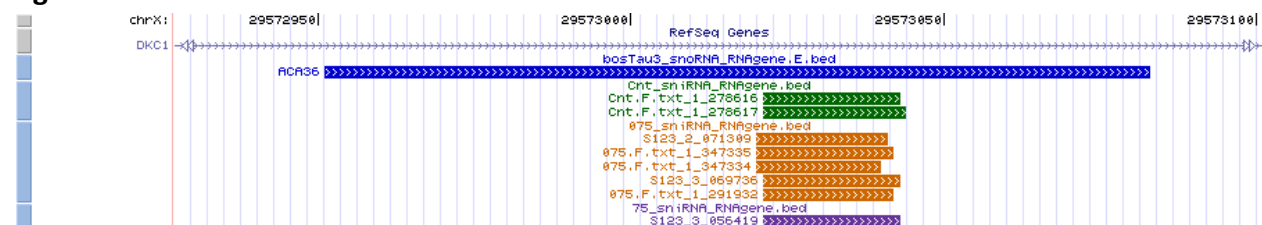

Fig S5f.

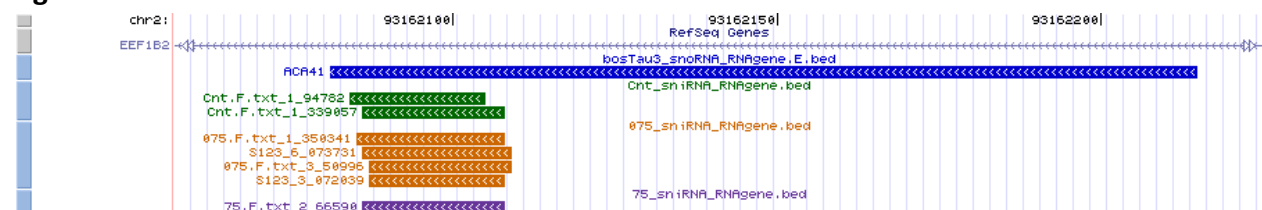

Fig S5g.

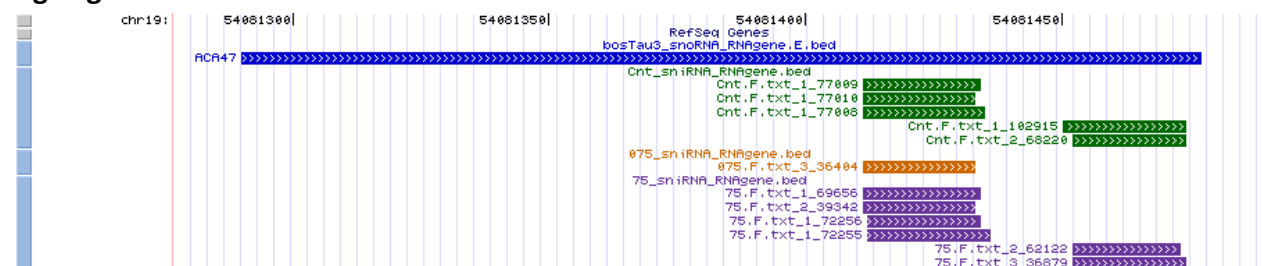

Fig S5h.

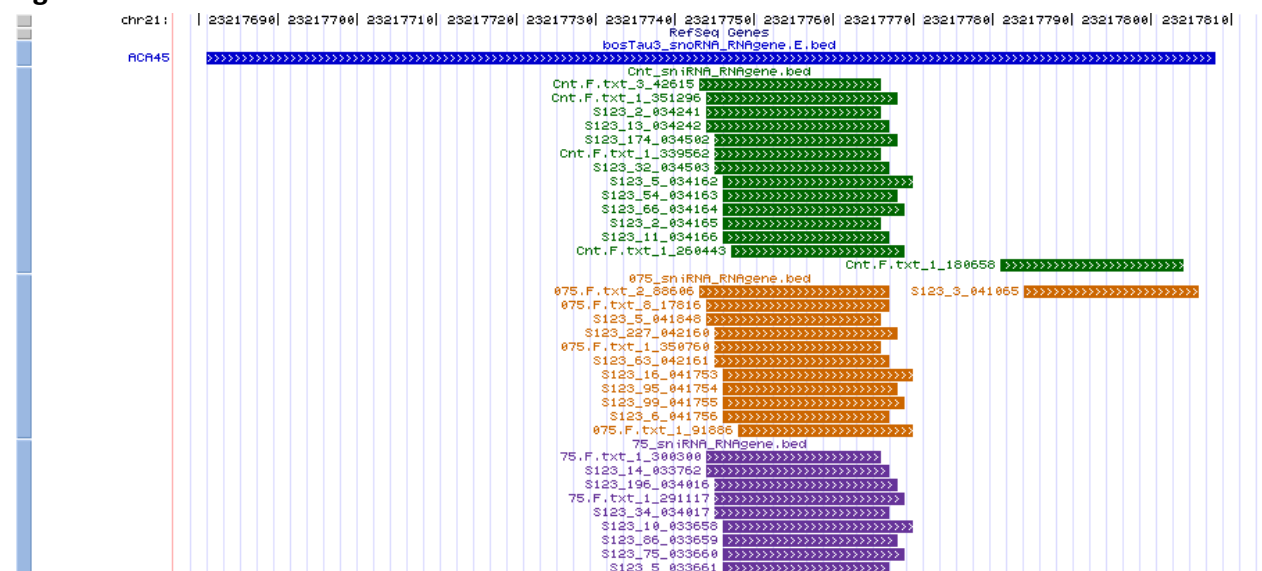

Fig S5i.

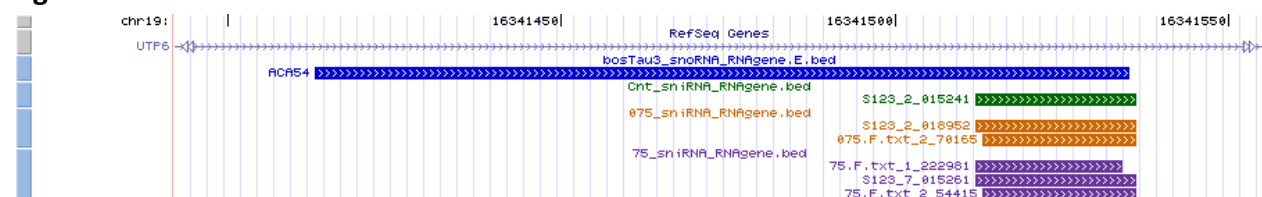

Glazov EA et al. Supplemental Figure S5

Fig S5j.

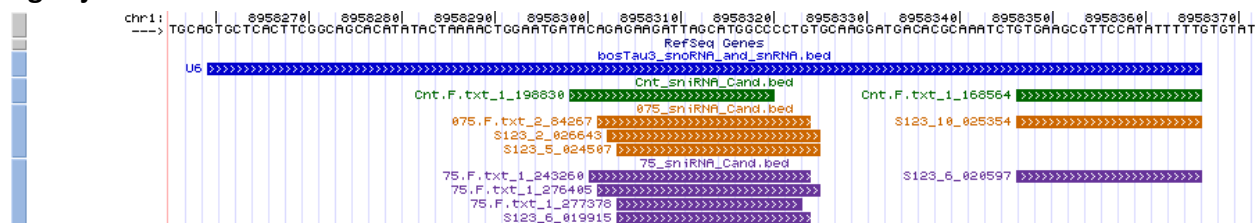

Fig S5k.

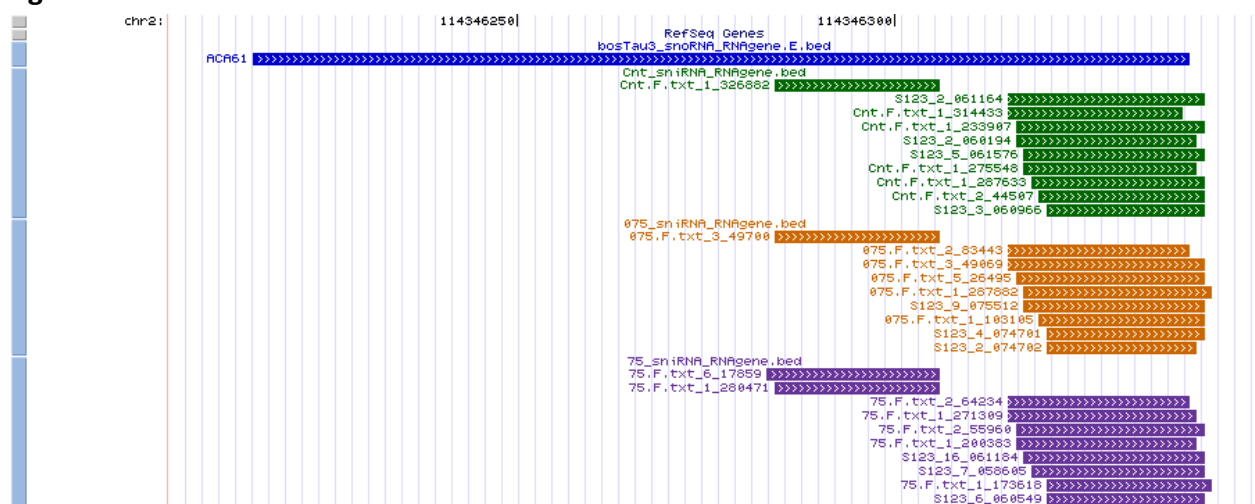

**Supplemental Figures S5a-S5k. snoRNA-derived small RNAs.** The figures shows UCSC genome browser screens displaying relative positions of bovine snoRNA or snRNA (blue) and sequence tags originating from this loci in three small RNA libraries: mock-infected control - green, MOI 0.75 library - dark orange, MOI 7.5 library – magenta. Arrowheads indicate alignment of sequences relative to the genomic strands.
