# Supplementary material for: Repertoire of Bovine miRNA and miRNA-Like Small Regulatory RNAs Expressed upon Viral Infection
Source: PLoS One. 2009 Jul 27;4(7):e6349. doi: 10.1371/journal.pone.0006349 (PMC2713767; doi:10.1371/journal.pone.0006349)
Supplement: Table S2 — Sequence and genomic coordinates information for new miRNA* identified in this study. (0.03 MB XLS) [file pone.0006349.s002.xls]

## Sheet: Supplemental_Table_S2
Supplemental Table S2 New miRNA*
miRNA ID	Genomic coordinates (bosTau3)	Strand	Sequence (5'->3')
bta-mir-200b	chr16:48288593-48288615	-	catcttactgggcagcattgga
bta-mir-365	chr25:13810940-13810963	-	agggacttttgggggcagatgtg
bta-let-7a-2	chr15:25630953-25630974	+	taactgtacagcctcctagct
bta-mir-128-1	chr2:57956015-57956036	-	cggggccgtagcactgtctga
bta-mir-26a	chr5:54583426-54583448	+	cctattcttgattacttgtttc
bta-mir-181b	chr11:91158348-91158370	-	actcactgatcaatgaatgtaa
bta-mir-186	chr3:70093994-70094016	+	gcccaaaggtgaattttttggg
bta-mir-98	chrX:61468035-61468056	-	ctatacaacttactactttcc
bta-mir-15a	chr12:16935132-16935152	+	caggccatattgtgctgcct
bta-mir-10b	chr2:19029011-19029032	+	cagattcgattctaggggaat
bta-mir-145	chr7:56842620-56842640	+	attcctggaaatactgttct
bta-mir-215	chr16:20579640-20579663	-	tctgtcatttctgtaggccaatg
bta-mir-124a	chr8:7658135-7658156	-	tcaaggtccgctgtgaacacg
bta-mir-122	chr24:55066243-55066264	-	aacgccattatcacactaaat
bta-mir-139	chr15:45732719-45732741	+	tggagacgcggccctgttggag
bta-mir-29c	chr16:68741279-68741302	+	tgaccgatttctcctggtgttca
bta-mir-331	chr5:25052153-25052174	-	tctaggtatggtcccagggat
bta-mir-423	chr19:19498643-19498666	+	tgaggggcagagagcgagacttt
bta-mir-25	chr25:36671693-36671716	+	aggcggagacttgggcaattgct
bta-mir-191	chr22:49016470-49016490	+	gctgcgcttggatttcgttc
bta-let-7f-1	chr8:80022233-80022254	-	ctatacaatctattgccttcc
bta-mir-34a	chr16:42657032-42657054	+	aatcagcaagtatactgcccta
bta-mir-27b	chr8:76760755-76760778	+	agagcttagctgattggtgaaca
bta-mir-23b	chr8:76760529-76760550	+	gggttcctggcatgctgattt
bta-mir-342	chr21:58764645-58764668	+	aggggtgctatctgtggttgagg
bta-mir-221	chrX:66622125-66622147	-	acctggcatacaatgtagattt
bta-mir-30d	chr14:6483510-6483532	+	ctttcagtcagatgtttgctgc
bta-let-7g	chr22:46884928-46884949	+	ctgtacaggccactgccttgc
bta-mir-29b	chr16:68740714-68740734	+	ctggtttcacatggtggctt
bta-mir-18a	chr12:55786734-55786755	+	actgccctaagtgctccttct
bta-let-7f-2	chrX:61468926-61468946	-	ctatacagtctactgtcttt
bta-let-7d	chr8:80020027-80020049	-	ctatacgacctgctgcctttct
bta-mir-125b-1	chr15:25679731-25679751	+	acgggttaggctcttgggag
bta-mir-374a	chrX:55063342-55063364	-	cttatcaggttgtattgtaatt
bta-mir-181a	chr11:91159540-91159561	-	accaccgaccgttgactgtac
bta-mir-214	chr16:37704597-37704618	+	cacagcaagtgtagacaggca
bta-mir-148b	chr5:26304479-26304503	-	gaagttctgttatacactcaggct
bta-mir-532	chrX:60739798-60739820	+	cctcccacacccaaggcttgca
bta-mir-30b	chr14:6487863-6487884	+	ctgggaggtggatgtttactt
bta-mir-345	chr21:58924116-58924136	+	cctgaactaggggtctggag
bta-mir-140	chr18:34146918-34146939	+	cagtggttttaccctatggta
bta-mir-20a	chr12:55787039-55787059	+	actgcattatgagcacttaa
bta-mir-22-3p	chr19:21406542-21406564	-	aagctgccagttgaagaactgt
bta-mir-99a	chr1:16774703-16774726	+	caagctcgcttctatgggtctgt
bta-mir-93	chr25:36671527-36671547	+	ctactgctgagccagcactt
bta-mir-27a	chr7:9826917-9826939	+	agggcttagctgcttgtgagca
bta-mir-200a	chr16:48287940-48287962	-	catcttaccggacagtgctgga
bta-mir-29a	chr4:88643716-88643738	+	actgatttcttttggtgttcag
bta-let-7i	chr5:50605229-50605251	+	ctgcgcaagctactgccttgct
bta-mir-23a	chr7:9826738-9826760	+	ggggttcctggggatgggattt
bta-mir-30a	chr9:8177934-8177955	+	ctttcagtcggatgtttgcag
bta-mir-10a	chr19:36659357-36659378	+	caaattcgtatctaggggaat
bta-mir-24-2	chr7:9827070-9827094	+	gtgcctactgagctgaaacacagt
bta-mir-361	chrX:47517189-47517212	+	tcccccaggtgtgattctgattt
bta-mir-222	chrX:66622815-66622837	-	ggctcagtagccagtgtagatc
